# Supplementary material for: Metagenomic Analysis of the Bacterial Community Associated with the Taproot of Sugar Beet
Source: PubMed Central journal article supplement (PMC4356465; doi:10.1264/jsme2.me14109), 2015-02-14
Supplement: 30_63_s1.pdf [file 30_63_s1.pdf]

1

Table S1. Chemical characteristics of soils in the experimental fields

| Experimental field | pH  | P <sub>2</sub> O <sub>5</sub><br>(mg·kg <sup>-1</sup> ) | K <sub>2</sub> O<br>(mg·kg <sup>-1</sup> ) | MgO<br>(mg·kg <sup>-1</sup> ) | CaO<br>(mg·kg <sup>-1</sup> ) | Total<br>nitrogen<br>(%) | NO <sub>3</sub> -N<br>(mg·kg <sup>-1</sup> ) | NH <sub>4</sub> -N<br>(mg·kg <sup>-1</sup> ) | Phosphate<br>absorption<br>coefficient | CEC<br>(mg·kg <sup>-1</sup> ) |
|--------------------|-----|---------------------------------------------------------|--------------------------------------------|-------------------------------|-------------------------------|--------------------------|----------------------------------------------|----------------------------------------------|----------------------------------------|-------------------------------|
| Hokkaido           | 5.4 | 106                                                     | 181                                        | 135                           | 1,498                         | 0.27                     | 36                                           | 5.5                                          | 1,812                                  | 196                           |
| Yamagata           | 6.0 | 516                                                     | 464                                        | 1,419                         | 6,053                         | 0.15                     | 149                                          | 272                                          | 1,101                                  | 301                           |

2

3

Table S2. Methanol dehydrogenase (MDH)-related sequence reads in the bacterial community of sugar beet taproot

|                             | Type of MDH <sup>a</sup> | Length (bp) | Results of TBLASTN <sup>b</sup> |              |            |           |         |             |           |           |         |              |            |           |         |             |           |           |
|-----------------------------|--------------------------|-------------|---------------------------------|--------------|------------|-----------|---------|-------------|-----------|-----------|---------|--------------|------------|-----------|---------|-------------|-----------|-----------|
|                             |                          |             | xoxF                            |              |            |           |         |             |           | mxaF      |         |              |            |           |         |             |           |           |
|                             |                          |             | E-value                         | Identity (%) | Hit length | Hit start | Hit end | Query start | Query end | Hit frame | E-value | Identity (%) | Hit length | Hit start | Hit end | Query start | Query end | Hit frame |
| <b>NPK9</b>                 |                          |             |                                 |              |            |           |         |             |           |           |         |              |            |           |         |             |           |           |
| HSSJVCC01DDEZ5              | <i>xoxF</i>              | 744         | 2.E-100                         | 75           | 588        | 1         | 588     | 350         | 551       | 1         | 1.E-66  | 50           | 663        | 1         | 663     | 351         | 573       | 1         |
| HSSJVCC01EGHET              | <i>xoxF</i>              | 712         | 3.E-77                          | 74           | 474        | 1         | 474     | 31          | 188       | -2        | 3.E-47  | 50           | 498        | 4         | 501     | 16          | 187       | -2        |
| HSSJVCC01EIJ9D              | UD                       | 908         | 3.E-76                          | 74           | 474        | 1         | 474     | 31          | 188       | -3        | 2.E-46  | 50           | 498        | 4         | 501     | 16          | 187       | -3        |
| HSSJVCC01CQL3E              | UD                       | 640         | 7.E-36                          | 42           | 537        | 25        | 561     | 40          | 219       | -2        | 3.E-34  | 42           | 549        | 46        | 594     | 23          | 212       | -2        |
| HSSJVCC01EG7FS              | UD                       | 708         | 1.E-13                          | 41           | 315        | 378       | 692     | 447         | 551       | -2        | 8.E-25  | 53           | 342        | 237       | 578     | 483         | 593       | -2        |
| HSSJVCC01E38BH <sup>c</sup> | UD                       | 828         | 3.E-11                          | 41           | 300        | 375       | 674     | 43          | 137       | -2        |         |              |            |           |         |             |           |           |
| HSSJVCC01AIV7K <sup>d</sup> | UD                       | 632         |                                 |              |            |           |         |             |           |           | 7.E-13  | 40           | 270        | 135       | 404     | 465         | 554       | 3         |
| <b>NPK10</b>                |                          |             |                                 |              |            |           |         |             |           |           |         |              |            |           |         |             |           |           |
| HSSJVCC01ENAYA              | <i>xoxF</i>              | 855         | 4.E-154                         | 79           | 795        | 5         | 799     | 212         | 478       | -3        | 4.E-76  | 52           | 747        | 44        | 790     | 215         | 457       | -3        |
| HSSJVCC01BYXFR              | UD                       | 944         | 1.E-86                          | 45           | 933        | 11        | 943     | 122         | 441       | 2         | 2.E-91  | 47           | 942        | 2         | 943     | 113         | 434       | 2         |
| HSSJVCC01BR07U              | UD                       | 771         | 6.E-68                          | 45           | 765        | 3         | 767     | 277         | 542       | 3         | 2.E-57  | 40           | 762        | 3         | 764     | 277         | 538       | 3         |
| HSSJVCC01CH5JZ <sup>c</sup> | UD                       | 772         | 1.E-54                          | 44           | 648        | 3         | 650     | 277         | 503       | 3         |         |              |            |           |         |             |           |           |
| HSSJVCC01C9LBB              | UD                       | 703         | 7.E-26                          | 40           | 459        | 24        | 482     | 239         | 392       | 3         | 4.E-22  | 41           | 357        | 75        | 431     | 253         | 369       | 3         |
| HSSJVCC01CTAAW              | UD                       | 753         | 7.E-15                          | 46           | 357        | 6         | 362     | 485         | 600       | 3         | 6.E-25  | 51           | 351        | 6         | 356     | 482         | 595       | 3         |
| HSSJVCC01D6QX0 <sup>d</sup> | UD                       | 694         |                                 |              |            |           |         |             |           |           | 4.E-41  | 40           | 657        | 1         | 657     | 144         | 366       | -2        |
| <b>NPK12</b>                |                          |             |                                 |              |            |           |         |             |           |           |         |              |            |           |         |             |           |           |
| HSSJVCC01EID1Y              | <i>xoxF</i>              | 829         | 5.E-129                         | 66           | 825        | 3         | 827     | 197         | 473       | -3        | 4.E-72  | 46           | 807        | 21        | 827     | 197         | 460       | -3        |
| HSSJVCC01D8JMI              | <i>xoxF</i>              | 807         | 2.E-122                         | 77           | 678        | 1         | 678     | 325         | 551       | 1         | 3.E-75  | 50           | 780        | 1         | 780     | 325         | 582       | 1         |
| HSSJVCC01C9RDW              | <i>xoxF</i>              | 704         | 1.E-108                         | 74           | 618        | 12        | 629     | 314         | 520       | -1        | 8.E-53  | 45           | 666        | 15        | 680     | 304         | 516       | -1        |
| HSSJVCC01CUNRH              | <i>xoxF</i>              | 828         | 1.E-92                          | 79           | 501        | 2         | 502     | 123         | 289       | 2         | 3.E-69  | 51           | 498        | 5         | 502     | 118         | 289       | 2         |
| HSSJVCC01D35ZZ              | <i>xoxF</i>              | 772         | 6.E-89                          | 80           | 639        | 3         | 641     | 387         | 600       | 3         | 1.E-61  | 51           | 591        | 45        | 635     | 394         | 595       | 3         |
| HSSJVCC01B9HLP              | <i>xoxF</i>              | 678         | 5.E-88                          | 69           | 591        | 1         | 591     | 22          | 215       | -1        | 3.E-57  | 51           | 591        | 1         | 591     | 16          | 215       | -1        |
| HSSJVCC01BHF8J              | <i>xoxF</i>              | 925         | 2.E-82                          | 80           | 621        | 305       | 925     | 395         | 601       | -1        | 1.E-60  | 52           | 594        | 314       | 907     | 394         | 595       | -1        |
| HSSJVCC01C9A3H              | <i>xoxF</i>              | 664         | 4.E-77                          | 80           | 450        | 3         | 452     | 387         | 537       | 3         | 2.E-46  | 51           | 405        | 45        | 449     | 394         | 533       | 3         |
| HSSJVCC01ELEBG              | <i>xoxF</i>              | 663         | 9.E-66                          | 73           | 585        | 56        | 640     | 405         | 600       | 2         | 1.E-53  | 49           | 567        | 68        | 634     | 402         | 595       | 2         |
| HSSJVCC01D5XQ9              | UD                       | 794         | 6.E-55                          | 64           | 282        | 312       | 593     | 22          | 115       | 3         | 1.E-30  | 48           | 282        | 312       | 593     | 16          | 109       | 3         |
| HSSJVCC01CJTS3              | UD                       | 863         | 6.E-49                          | 50           | 552        | 312       | 863     | 22          | 206       | 3         | 8.E-39  | 51           | 330        | 312       | 641     | 16          | 125       | 3         |
| HSSJVCC01B7T8N <sup>c</sup> | UD                       | 711         | 2.E-47                          | 40           | 702        | 5         | 706     | 50          | 306       | -3        |         |              |            |           |         |             |           |           |
| HSSJVCC01DP43C              | UD                       | 742         | 4.E-41                          | 47           | 594        | 109       | 702     | 404         | 600       | -2        | 1.E-41  | 42           | 621        | 115       | 735     | 382         | 595       | -2        |
| HSSJVCC01DY1QQ              | UD                       | 616         | 5.E-32                          | 42           | 456        | 124       | 579     | 22          | 172       | 1         | 3.E-27  | 41           | 456        | 124       | 579     | 16          | 172       | 1         |
| HSSJVCC01CWEH8 <sup>c</sup> | UD                       | 618         | 1.E-30                          | 40           | 450        | 9         | 458     | 178         | 337       | 3         |         |              |            |           |         |             |           |           |
| HSSJVCC01CH9JT              | UD                       | 429         | 1.E-26                          | 41           | 423        | 5         | 427     | 148         | 306       | -3        | 8.E-30  | 42           | 423        | 5         | 427     | 148         | 306       | -3        |
| HSSJVCC01DVPUI <sup>c</sup> | UD                       | 515         | 2.E-17                          | 41           | 411        | 102       | 512     | 420         | 551       | -1        |         |              |            |           |         |             |           |           |
| HSSJVCC01CJS2K <sup>d</sup> | UD                       | 808         |                                 |              |            |           |         |             |           |           | 5.E-44  | 40           | 711        | 6         | 716     | 177         | 424       | 3         |
| HSSJVCC01DK6FC <sup>d</sup> | UD                       | 620         |                                 |              |            |           |         |             |           |           | 5.E-12  | 40           | 261        | 167       | 427     | 467         | 553       | 2         |
| HSSJVCC01DKZ3R <sup>d</sup> | UD                       | 435         |                                 |              |            |           |         |             |           |           | 6.E-12  | 40           | 261        | 167       | 427     | 467         | 553       | 2         |

<sup>a</sup> Type of MDH was determined by the distance of clusters in a phylogenetic tree analysis. The UD means "undetermined" because a metagenome sequence read located in the out group of the trees of *xoxF* and *mxaF* genes.

<sup>b</sup> In this TBLASTN search, *xoxF* and *mxaF* genes in *Methylobacterium extorquens* AM1 were used as query sequences (YP\_002962861 and ACS42169, respectively). The metagenome sequences were used as database.

<sup>c</sup> Identified only by TBLASTN using an amino acid sequence of *xoxF* gene as query.

<sup>d</sup> Identified only by TBLASTN using an amino acid sequence of *mxaF* gene as query.

Table S3. Detection frequency of the genes for siderophore in the bacterial community of sugar beet taproot

|                                                                                    | ID of KEGG | Gene length <sup>a</sup> |              | Frequency per 10 <sup>5</sup> reads <sup>b</sup> |
|------------------------------------------------------------------------------------|------------|--------------------------|--------------|--------------------------------------------------|
|                                                                                    |            | ID of UniRef             | length (kbp) |                                                  |
| <i>pchB</i> ; isochorismate pyruvate lyase [EC:4.2.99.21]                          | K04782     | UniRef50_Q51507          | 0.306        | 10 ± 7                                           |
| <i>dhbF</i> ; nonribosomal peptide synthetase DhbF                                 | K04780     | UniRef50_C6U462          | 3.270        | 3 ± 0.6                                          |
| <i>entF</i> ; enterobactin synthetase component F [EC:2.7.7.-]                     | K02364     | UniRef50_P11454          | 3.882        | 1 ± 0.6                                          |
| <i>menF</i> ; menaquinone-specific isochorismate synthase [EC:5.4.4.2]             | K02552     | UniRef50_A4SS27          | 1.356        | 0.8 ± 0.6                                        |
| <i>mbtG</i> ; mycobactin lysine-N-oxygenase                                        | K04793     | UniRef50_Q7TYQ9          | 1.296        | 0.6 ± 0.8                                        |
| <i>mbtD</i> ; mycobactin polyketide synthetase MbtD                                | K04791     | UniRef50_S4ZBN7          | 3.102        | 0.5 ± 0.7                                        |
| <i>entE</i> ; 2,3-dihydroxybenzoate-AMP ligase [EC:2.7.7.58]                       | K02363     | UniRef50_Q8XBV3          | 1.611        | 0.4 ± 0.6                                        |
| <i>mbtE</i> ; mycobactin peptide synthetase MbtE                                   | K04789     | UniRef50_I2AEV7          | 5.031        | 0.4 ± 0.4                                        |
| <i>irp2</i> ; yersiniabactin nonribosomal peptide synthetase                       | K04784     | UniRef50_P48633          | 6.108        | 0.3 ± 0.2                                        |
| <i>mbtA</i> ; mycobactin salicyl-AMP ligase [EC:6.3.2.-]                           | K04787     | UniRef50_P40871          | 1.620        | 0.3 ± 0.4                                        |
| <i>vibF</i> ; nonribosomal peptide synthetase VibF                                 | K12237     | UniRef50_F21QY7          | 7.254        | 0.2 ± 0.2                                        |
| <i>mbtB</i> ; mycobactin phenylloxazoline synthetase                               | K04788     | UniRef50_Q7TYQ4          | 4.245        | 0.1 ± 0.1                                        |
| <i>irp1</i> ; yersiniabactin nonribosomal peptide/polyketide synthase              | K04786     | UniRef50_A0A067HFK8      | 9.492        | 0.1 ± 0.1                                        |
| <i>entA</i> ; 2,3-dihydro-2,3-dihydroxybenzoate dehydrogenase [EC:1.3.1.28]        | K00216     |                          |              | ND                                               |
| <i>entB</i> ; bifunctional isochorismate lyase / aryl carrier protein [EC:3.3.2.1] | K01252     |                          |              | ND                                               |
| <i>pchA</i> ; salicylate biosynthesis isochorismate synthase [EC:5.4.4.2]          | K01851     |                          |              | ND                                               |
| <i>entC</i> ; isochorismate synthase [EC:5.4.4.2]                                  | K02361     |                          |              | ND                                               |
| <i>vibH</i> ; vibriobactin synthetase                                              | K04778     |                          |              | ND                                               |
| <i>mbtI</i> ; salicylate synthetase [EC:5.4.4.2 4.2.99.21]                         | K04781     |                          |              | ND                                               |
| <i>irp5</i> ; yersiniabactin salicyl-AMP ligase [EC:6.3.2.-]                       | K04783     |                          |              | ND                                               |
| <i>irp3</i> ; yersiniabactin synthetase, thiazolanyl reductase component           | K04785     |                          |              | ND                                               |
| <i>mbtC</i> ; mycobactin polyketide synthetase MbtC                                | K04790     |                          |              | ND                                               |
| <i>mbtF</i> ; mycobactin peptide synthetase MbtF                                   | K04792     |                          |              | ND                                               |
| <i>pchD</i> ; pyochelin biosynthesis protein PchD                                  | K12238     |                          |              | ND                                               |
| <i>pchE</i> ; dihydroaeruginic acid synthetase                                     | K12239     |                          |              | ND                                               |
| <i>pchF</i> ; pyochelin synthetase                                                 | K12240     |                          |              | ND                                               |
| <i>pchG</i> ; pyochelin biosynthetic protein PchG                                  | K12241     |                          |              | ND                                               |
| <i>mxgG</i> ; nonribosomal peptide synthetase MxgG                                 | K15653     |                          |              | ND                                               |
| <i>mxgL</i> ; aminotransferase MxgL                                                | K15681     |                          |              | ND                                               |

<sup>a</sup> Approximately gene length (kbp) was deduced by using the information of the UniProt Reference Clusters (UniRef) database. The gene length of the undetected genes was not surveyed.

<sup>b</sup> ND = not detected. The values represent means ± standard deviation ( $n = 3$ ).

Table S4. Taxonomic assignment of  $\beta$ -1,3-glucanase related sequence reads.

| Taxonomic group <sup>a</sup>                   | Frequency<br>per 10 <sup>5</sup> reads <sup>b</sup> |
|------------------------------------------------|-----------------------------------------------------|
| <i>Bradyrhizobium</i>                          | 4 ± 2                                               |
| <i>Afipia</i>                                  | 4 ± 4                                               |
| <i>Nitrobacter</i>                             | 4 ± 2                                               |
| <i>Rhodopseudomonas</i>                        | 1 ± 2                                               |
| <i>Bradyrhizobiaceae</i> (Family) <sup>c</sup> | 1 ± 0.8                                             |
| <i>Oligotropha</i>                             | 0.8 ± 1                                             |
| <i>Rhodovulum</i>                              | 0.8 ± 1                                             |
| <i>Chaetomium</i>                              | 0.5 ± 0.7                                           |
| <i>Neosartorya</i>                             | 0.5 ± 0.7                                           |
| Sum                                            | 18 ± 6                                              |

<sup>a</sup> Gray indicates major taxonomic groups (*Mesorhizobium*, *Bradyrhizobium* and *Streptomyces*) at genus level in the bacterial community of sugar beet taproot.

<sup>b</sup> The values represent means ± standard deviation ( $n = 3$ ).

<sup>c</sup> Taxonomic assignment of these sequence reads was not determined at genus level, but determined at family level by MEGAN.

Table S5. Taxonomic assignment of quinoprotein glucose dehydrogenase (GDH) related sequence reads.

| Taxonomic group <sup>a</sup> | Frequency<br>per 10 <sup>5</sup> reads <sup>b</sup> |
|------------------------------|-----------------------------------------------------|
| <i>Sphingobium</i>           | 2 ± 0.7                                             |
| <i>Bradyrhizobium</i>        | 1 ± 1                                               |
| <i>Chthoniobacter</i>        | 0.9 ± 0.1                                           |
| <i>Rickettsiella</i>         | 0.7 ± 1.0                                           |
| <i>Pseudomonas</i>           | 0.7 ± 0.2                                           |
| <i>Rhizobium</i>             | 0.6 ± 0.5                                           |
| <i>Sphingomonas</i>          | 0.6 ± 0.5                                           |
| <i>Brevundimonas</i>         | 0.6 ± 0.8                                           |
| <i>Ochrobactrum</i>          | 0.6 ± 0.8                                           |
| <i>Agrobacterium</i>         | 0.5 ± 0.4                                           |
| <i>Sinorhizobium</i>         | 0.5 ± 0.4                                           |
| <i>Mesorhizobium</i>         | 0.5 ± 0.7                                           |
| <i>Verrucomicrobium</i>      | 0.5 ± 0.7                                           |
| <i>Sorangium</i>             | 0.5 ± 0.4                                           |
| <i>Gemmata</i>               | 0.3 ± 0.5                                           |
| <i>Alcanivorax</i>           | 0.3 ± 0.4                                           |
| <i>Bilophila</i>             | 0.3 ± 0.4                                           |
| <i>Chelativorans</i>         | 0.3 ± 0.4                                           |
| <i>Citrobacter</i>           | 0.3 ± 0.4                                           |
| <i>Microvirga</i>            | 0.3 ± 0.4                                           |
| <i>Planctomyces</i>          | 0.3 ± 0.4                                           |
| <i>Schlesneria</i>           | 0.3 ± 0.4                                           |
| <i>Variovorax</i>            | 0.3 ± 0.4                                           |
| <i>Halomonas</i>             | 0.2 ± 0.3                                           |
| <i>Pirellula</i>             | 0.2 ± 0.3                                           |
| <i>Robiginitalea</i>         | 0.2 ± 0.3                                           |
| <i>Stenotrophomonas</i>      | 0.2 ± 0.3                                           |
| <i>Terriglobus</i>           | 0.2 ± 0.3                                           |
| <i>Blastopirellula</i>       | 0.2 ± 0.3                                           |
| <i>Singulisphaera</i>        | 0.2 ± 0.2                                           |
| <i>Tistrella</i>             | 0.2 ± 0.2                                           |
| Unknown                      | 0.2 ± 0.2                                           |
| Sum                          | 15 ± 5                                              |

<sup>a</sup> Gray indicates major taxonomic groups (*Mesorhizobium*, *Bradyrhizobium* and *Streptomyces*) at genus level in the bacterial community of sugar beet taproot.

<sup>b</sup> The values represent means ± standard deviation ( $n = 3$ ).

Table S6. Taxonomic assignment of methanol dehydrogenase (MDH) related sequence reads.

| Taxonomic group <sup>a</sup> | Frequency<br>per 10 <sup>5</sup> reads <sup>b</sup> |
|------------------------------|-----------------------------------------------------|
| <i>Bradyrhizobium</i>        | 3 ± 2                                               |
| <i>Mesorhizobium</i>         | 2 ± 0.6                                             |
| <i>Novosphingobium</i>       | 0.9 ± 0.6                                           |
| <i>Rhodopseudomonas</i>      | 0.7 ± 1                                             |
| <i>Azospirillum</i>          | 0.6 ± 0.9                                           |
| <i>Afipia</i>                | 0.6 ± 0.4                                           |
| <i>Thiorhodococcus</i>       | 0.4 ± 0.6                                           |
| <i>Variovorax</i>            | 0.4 ± 0.6                                           |
| <i>Burkholderia</i>          | 0.3 ± 0.5                                           |
| <i>Curvibacter</i>           | 0.3 ± 0.5                                           |
| <i>Methyloferula</i>         | 0.2 ± 0.3                                           |
| <i>Pelagibaca</i>            | 0.2 ± 0.3                                           |
| <i>Rhizobium</i>             | 0.2 ± 0.3                                           |
| Sum                          | 10 ± 3                                              |

<sup>a</sup> Gray indicates major taxonomic groups (*Mesorhizobium*, *Bradyrhizobium* and *Streptomyces*) at genus level in the bacterial community of sugar beet taproot.

<sup>b</sup> The values represent means ± standard deviation ( $n = 3$ ).

Table S7. Taxonomic assignment of isochorismate pyruvate lyase (*pchB*) related sequence reads.

| Taxonomic group        | Frequency<br>per $10^5$ reads <sup>a</sup> |
|------------------------|--------------------------------------------|
| <i>Sinorhizobium</i>   | $5 \pm 7$                                  |
| <i>Pelagibacterium</i> | $3 \pm 4$                                  |
| <i>Pseudomonas</i>     | $1 \pm 2$                                  |
| <i>Jannaschia</i>      | $1 \pm 2$                                  |
| Sum                    | $10 \pm 7$                                 |

<sup>a</sup> The values represent means  $\pm$  standard deviation ( $n = 3$ ).

Table S8. Taxonomic assignment of ACC deaminase related sequence reads.

| Taxonomic group <sup>a</sup> | Frequency<br>per 10 <sup>5</sup> reads <sup>b</sup> |
|------------------------------|-----------------------------------------------------|
| <i>Rhizobium</i>             | 2 ± 3                                               |
| <i>Bradyrhizobium</i>        | 2 ± 1                                               |
| <i>Agrobacterium</i>         | 1 ± 0.9                                             |
| <i>Pseudomonas</i>           | 1 ± 0.9                                             |
| <i>Streptomyces</i>          | 0.7 ± 1                                             |
| <i>Protochlamydia</i>        | 0.6 ± 0.8                                           |
| <i>Variovorax</i>            | 0.6 ± 0.8                                           |
| <i>Collimonas</i>            | 0.4 ± 0.6                                           |
| <i>Phyllobacterium</i>       | 0.4 ± 0.6                                           |
| Sum                          | 9 ± 6                                               |

<sup>a</sup> Gray indicates major taxonomic groups (*Mesorhizobium*, *Bradyrhizobium* and *Streptomyces*) at genus level in the bacterial community of sugar beet taproot.

<sup>b</sup> The values represent means ± standard deviation ( $n = 3$ ).

24

25



Table S9. Taxonomic assignment of chitinase related sequence reads.

| Taxonomic group <sup>a</sup> | Frequency<br>per 10 <sup>5</sup> reads <sup>b</sup> |
|------------------------------|-----------------------------------------------------|
| <i>Streptomyces</i>          | 0.9 ± 1.2                                           |
| <i>Chaetomium</i>            | 0.6 ± 0.8                                           |
| <i>Geobacter</i>             | 0.6 ± 0.8                                           |
| <i>Aspergillus</i>           | 0.5 ± 0.7                                           |
| <i>Stenotrophomonas</i>      | 0.5 ± 0.7                                           |
| <i>Trichophyton</i>          | 0.5 ± 0.7                                           |
| <i>Rhodopirellula</i>        | 0.4 ± 0.6                                           |
| <i>Stanieria</i>             | 0.4 ± 0.6                                           |
| <i>Amycolatopsis</i>         | 0.3 ± 0.4                                           |
| <i>Bradyrhizobium</i>        | 0.3 ± 0.4                                           |
| <i>Grosmannia</i>            | 0.3 ± 0.4                                           |
| <i>Magnaporthe</i>           | 0.3 ± 0.4                                           |
| <i>Myceliophthora</i>        | 0.3 ± 0.4                                           |
| <i>Mycobacterium</i>         | 0.3 ± 0.4                                           |
| <i>Xanthomonas</i>           | 0.3 ± 0.4                                           |
| Sum                          | 6 ± 4                                               |

<sup>a</sup> Gray indicates major taxonomic groups (*Mesorhizobium*, *Bradyrhizobium* and *Streptomyces*) at genus level in the bacterial community of sugar beet taproot.

<sup>b</sup> The values represent means ± standard deviation ( $n = 3$ ).

27

28

Table S10. Detection frequency of the genes for N metabolism in the bacterial community of sugar beet taproot

|                                                                                                      | ID of KEGG | Gene length <sup>a</sup> |              | Frequency per 10 <sup>5</sup> reads <sup>b</sup> |
|------------------------------------------------------------------------------------------------------|------------|--------------------------|--------------|--------------------------------------------------|
|                                                                                                      |            | ID of UniRef             | length (kbp) |                                                  |
| <i>glnA</i> ; glutamine synthetase [EC:6.3.1.2]                                                      | K01915     | UniRef50_A0R079          | 1.437        | 5 ± 0.6                                          |
| <i>cynT</i> ; can; carbonic anhydrase [EC:4.2.1.1]                                                   | K01673     | UniRef50_Q9I262          | 0.663        | 4 ± 0.6                                          |
| <i>ncd2</i> , <i>npd</i> ; nitronate monooxygenase [EC:1.13.12.16]                                   | K00459     | UniRef50_F8GQA6          | 1.254        | 3 ± 0.4                                          |
| <i>gudB</i> , <i>rocG</i> ; glutamate dehydrogenase [EC:1.4.1.2]                                     | K00260     | UniRef50_B2RKJ1          | 1.338        | 3 ± 0.2                                          |
| <i>gltD</i> ; glutamate synthase (NADPH/NADH) small chain [EC:1.4.1.13 1.4.1.14]                     | K00266     | UniRef50_P9WN18          | 1.467        | 2 ± 0.3                                          |
| <i>gltB</i> ; glutamate synthase (NADPH/NADH) large chain [EC:1.4.1.13 1.4.1.14]                     | K00265     | UniRef50_Q05755          | 4.548        | 2 ± 0.3                                          |
| <i>nirK</i> ; nitrite reductase (NO-forming) [EC:1.7.2.1]                                            | K00368     | UniRef50_P81445          | 0.993        | 1 ± 0.8                                          |
| <i>nirB</i> ; nitrite reductase (NADH) large subunit [EC:1.7.1.15]                                   | K00362     | UniRef90_A6U145          | 2.463        | 1 ± 0.3                                          |
| <i>cynS</i> ; cyanate lyase [EC:4.2.1.104]                                                           | K01725     | UniRef50_A2SLJ8          | 0.444        | 1 ± 0.7                                          |
| E1.4.1.4, <i>gdhA</i> ; glutamate dehydrogenase (NADP+) [EC:1.4.1.4]                                 | K00262     | UniRef50_B2RKJ1          | 1.338        | 0.9 ± 0.2                                        |
| <i>nasA</i> ; assimilatory nitrate reductase catalytic subunit [EC:1.7.99.4]                         | K00372     | UniRef50_E1VMR6          | 2.820        | 0.9 ± 0.2                                        |
| <i>nirD</i> ; nitrite reductase (NADH) small subunit [EC:1.7.1.15]                                   | K00363     | UniRef50_P0A230          | 0.327        | 0.8 ± 0.7                                        |
| E3.5.1.49; formamidase [EC:3.5.1.49]                                                                 | K01455     | UniRef50_Q887D9          | 1.017        | 0.7 ± 0.09                                       |
| E3.5.5.1; nitrilase [EC:3.5.5.1]                                                                     | K01501     | UniRef50_F8DUB5          | 0.990        | 0.7 ± 0.3                                        |
| GLUD1_2, <i>gdhA</i> ; glutamate dehydrogenase (NAD(P)+) [EC:1.4.1.3]                                | K00261     | UniRef50_Q0SJ78          | 1.290        | 0.6 ± 0.3                                        |
| <i>napA</i> ; periplasmic nitrate reductase NapA [EC:1.7.99.4]                                       | K02567     | UniRef50_B1Y6A6          | 2.556        | 0.6 ± 0.1                                        |
| <i>norB</i> ; nitric oxide reductase subunit B [EC:1.7.2.5]                                          | K04561     | UniRef50_P98008          | 1.425        | 0.5 ± 0.1                                        |
| <i>norC</i> ; nitric oxide reductase subunit C                                                       | K02305     | UniRef50_O06844          | 0.444        | 0.3 ± 0.5                                        |
| <i>arcC</i> ; carbamate [EC:2.7.2.2]                                                                 | K00926     | UniRef50_Q8FK51          | 0.894        | 0.3 ± 0.3                                        |
| <i>nirA</i> ; ferredoxin-nitrite reductase [EC:1.7.7.1]                                              | K00366     | UniRef50_Q89LH3          | 1.878        | 0.3 ± 0.07                                       |
| E1.4.7.1; glutamate synthase (ferredoxin) [EC:1.4.7.1]                                               | K00284     | UniRef50_P09831          | 4.461        | 0.3 ± 0.09                                       |
| <i>narG</i> ; nitrate reductase alpha subunit [EC:1.7.99.4]                                          | K00370     | UniRef50_P9WJQ2          | 3.699        | 0.3 ± 0.05                                       |
| <i>narJ</i> ; nitrate reductase delta subunit                                                        | K00373     | UniRef50_P0AF27          | 0.711        | 0.2 ± 0.05                                       |
| <i>nosZ</i> ; nitrous-oxide reductase [EC:1.7.2.4]                                                   | K00376     | UniRef50_Q8FX16          | 1.920        | 0.2 ± 0.09                                       |
| <i>narH</i> ; nitrate reductase beta subunit [EC:1.7.99.4]                                           | K00371     | UniRef50_Q83RN5          | 1.539        | 0.2 ± 0.2                                        |
| <i>nasB</i> ; assimilatory nitrate reductase electron transfer subunit [EC:1.7.99.4]                 | K00360     | UniRef50_A0JUE0          | 1.614        | 0.1 ± 0.1                                        |
| <i>narI</i> ; nitrate reductase gamma subunit [EC:1.7.99.4]                                          | K00374     | UniRef50_P0AF33          | 0.681        | 0.1 ± 0.2                                        |
| <i>nrfA</i> ; nitrite reductase (cytochrome c-552) [EC:1.7.2.2]                                      | K03385     | UniRef50_Q4QLL8          | 1.617        | 0.06 ± 0.05                                      |
| GLT1; glutamate synthase (NADPH/NADH) [EC:1.4.1.13 1.4.1.14]                                         | K00264     | UniRef50_Q0DGG35         | 6.567        | 0.01 ± 0.01                                      |
| NRT, <i>namrP</i> , <i>nasA</i> ; MFS transporter, NNP family, nitrate/nitrite transporter           | K02575     |                          |              | ND                                               |
| <i>nrtA</i> , <i>nasF</i> , <i>cynA</i> ; nitrate/nitrite transport system substrate-binding protein | K15576     |                          |              | ND                                               |
| <i>nrtB</i> , <i>nasE</i> , <i>cynB</i> ; nitrate/nitrite transport system permease protein          | K15577     |                          |              | ND                                               |
| <i>nrtC</i> , <i>nasD</i> ; nitrate/nitrite transport system ATP-binding protein [EC:3.6.3.-]        | K15578     |                          |              | ND                                               |
| <i>nrtD</i> , <i>cynD</i> ; nitrate/nitrite transport system ATP-binding protein                     | K15579     |                          |              | ND                                               |
| <i>narB</i> ; ferredoxin-nitrate reductase [EC:1.7.7.2]                                              | K00367     |                          |              | ND                                               |
| NR; nitrate reductase (NAD(P)H) [EC:1.7.1.1 1.7.1.2 1.7.1.3]                                         | K10534     |                          |              | ND                                               |
| <i>napB</i> ; cytochrome c-type protein NapB                                                         | K02568     |                          |              | ND                                               |
| NIT-6; nitrite reductase (NAD(P)H) [EC:1.7.1.4]                                                      | K17877     |                          |              | ND                                               |
| <i>nrfH</i> ; cytochrome c nitrite reductase small subunit                                           | K15876     |                          |              | ND                                               |
| <i>nirS</i> ; nitrite reductase (NO-forming) / hydroxylamine reductase [EC:1.7.2.1 1.7.99.1]         | K15864     |                          |              | ND                                               |
| CYP55; fungal nitric oxide reductase [EC:1.7.1.14]                                                   | K15877     |                          |              | ND                                               |
| <i>nifD</i> ; nitrogenase molybdenum-iron protein alpha chain [EC:1.18.6.1]                          | K02586     |                          |              | ND                                               |
| nifnitrogenase molybdenum-iron protein beta chain [EC:1.18.6.1]                                      | K02591     |                          |              | ND                                               |
| <i>nifH</i> ; nitrogenase iron protein NifH [EC:1.18.6.1]                                            | K02588     |                          |              | ND                                               |
| <i>anfG</i> ; nitrogenase delta subunit [EC:1.18.6.1]                                                | K00531     |                          |              | ND                                               |
| <i>pmoA-amoA</i> ; methane/ammonia monooxygenase subunit A [EC:1.14.18.3 1.14.99.39]                 | K10944     |                          |              | ND                                               |
| <i>pmoB-amoB</i> ; methane/ammonia monooxygenase subunit B                                           | K10945     |                          |              | ND                                               |
| <i>pmoC-amoC</i> ; methane/ammonia monooxygenase subunit C                                           | K10946     |                          |              | ND                                               |
| <i>hcp</i> ; hydroxylamine reductase [EC:1.7.99.1]                                                   | K05601     |                          |              | ND                                               |
| <i>hao</i> ; hydroxylamine dehydrogenase [EC:1.7.2.6]                                                | K10535     |                          |              | ND                                               |
| GDH2; glutamate dehydrogenase [EC:1.4.1.2]                                                           | K15371     |                          |              | ND                                               |
| CPS1; carbamoyl-phosphate synthase (ammonia) [EC:6.3.4.16]                                           | K01948     |                          |              | ND                                               |
| E4.2.1.1; carbonic anhydrase [EC:4.2.1.1]                                                            | K01672     |                          |              | ND                                               |
| <i>cah</i> ; carbonic anhydrase [EC:4.2.1.1]                                                         | K01674     |                          |              | ND                                               |

<sup>a</sup> Approximately gene length (kbp) was deduced by using the information of the UniProt Reference Clusters (UniRef) database. The gene length of the un-detected genes was not surveyed.

<sup>b</sup> ND = not detected. The values represent means ± standard deviation ( $n = 3$ ).

```

      5      15      25      35      45      55      65      75      85      95
XoxF  -----MRA VHLALGAGL AAASPALANE SVLKGVANPA EQVLOTVDYA NTRYSKLDDI NASNVKNLQV AWTFFSTQVLR GHEGSPLVVG NIMYVHTFPF
MxaF  MSRFVTSVSA LAMLALAP-A ALSSGAYAND KLVELSKSDD NWMVPGKNYD SNFSDLKQI KGNVVKQLRP AWTFFSTGLLN GHEGAPLVVD GKMYIHTSFP
      *   ***   *   *   *   *   *   *   *   *   *   *   *   *   *   *   *   *   *   *   *   *   *   *   *   *   *   *   *   *
      105     115     125     135     145     155     165     175     185     195
XoxF  NIVYALDLDQ GAKIVWKYEP KQDPSVIPVM CCTVNRGLA YADG----- AILLHQADTT LVSLDAKSGK VVWSVKNGDP SKGETNTATV LPVKDKVIVG
MxaF  NNTFALGLDD PGTILWQDKP KQNPAAARAVA CCDLVNRGLA YWPGDGKTPA LILKTQLDGN VAALNAETGE TVWKVENS DI KVGSTLT IAP YVVKDKV IIG
      *   **   *   *   *   *   *   *   *   *   *   *   *   *   *   *   *   *   *   *   *   *   *   *   *   *   *   *   *
      205     215     225     235     245     255     265     275     285     295
XoxF  ISGGEGVQC HVTAYDLKSG KKVNRGYSIG PDDQLIVDPE KTTSLGKPIG KDSSLKTWEG DQWKTGGGCT WGFYSYDPKL DLMYGGSGNP STWNPQKRPQ
MxaF  SSGAELGVRG YLTAYDVKTG EQVWRAYATG PDKDLLASD FNIKNPHYQQ KGLGTGTWEG DAWKIGGGTN WGWYAYDPGT NL IYFGTGNP APWNETMRPG
      **   **   ****   *   *   *   *   *   *   *   *   *   *   *   *   *   *   *   *   *   *   *   *   *   *   *   *
      305     315     325     335     345     355     365     375     385     395
XoxF  DNKWSMTIWA RNPDTGMAKW VYQMTPHDEW DFDGINEMIL TDQK-FDGKD RPLLTHFDRN GFQYTLDRAT GEVLVAEKFD PVVWATKVD LDKGSKTYGR
MxaF  DNKWTMTIFG RDADTGEAKF GYQKTPHDEW DYAGVNVMLL SEQKDKDGKA RKLLTHPDRN GIVYTLDRTD GALVSANKLD DTVNVFKSVD LKTG-----Q
      ****   *   *   *   *   *   *   *   *   *   *   *   *   *   *   *   *   *   *   *   *   *   *   *   *   *   *
      405     415     425     435     445     455     465     475     485     495
XoxF  PLVVSXYSTE QNGEDVNSKG ICPAALGTKD QQPAAFSPKT GLFYVPTNHV CMDYEPFRVT YTPGQPVYGA TLSMYPAPG- ---SHGMGN FIAWDLNQGK
MxaF  PVRDPEYGR ---MDHLAKD IOPSAMGYHN QGHDSYDPKR ELFFMGINHI CMDWEPFMLP YRAGQFFVGA TLMNYPGPKG DRQNYGLGQ IKAYNAITGD
      *   *   *   *   *   *   *   *   *   *   *   *   *   *   *   *   *   *   *   *   *   *   *   *   *   *
      505     515     525     535     545     555     565     575     585     595
XoxF  IKWSNEQFS ANGGALATAG DVVFYGTLEG FLKAVDSKTG KELYKFKTSP GIIGNVMTYE HKGKQHVAVL SGVGGWAGIG LAAGLTD PNA GLGAVGGYAA
MxaF  YKWEKMERFA VWGGTMATAG DLVFGYGLDG YLKARDSDTG DLLWKFKIPS GAIGYPMTYT HKGTQYVAIY YGVGGWPGVG LVFDLADPTA GLGAVGAFKK
      **   *   *   *   *   *   *   *   *   *   *   *   *   *   *   *   *   *   *   *   *   *   *   *   *   *   *
      605     615     625     635
XoxF  LSSYTNLGGQ LTVFSLPNN- -----
MxaF  LANYTQMGGG VVVFSLDGKG PYDDPNVGEW KSAAK
      *   **   *   ****

```

33

34 Figure S1. Amino acid sequence similarity between *xoxF* and *mxaF* genes in  
35 *Methylobacterium extorquens* AM1. The global alignment analysis was performed by  
36 ClustalW program on the Bioedit software  
37 (<http://www.mbio.ncsu.edu/bioedit/bioedit.html>). The consensus sequence was indicated by  
38 asterisk mark. BLASTP analysis revealed that the XoxF protein had 49% identities and 65%  
39 positives with the MxaF protein.

40

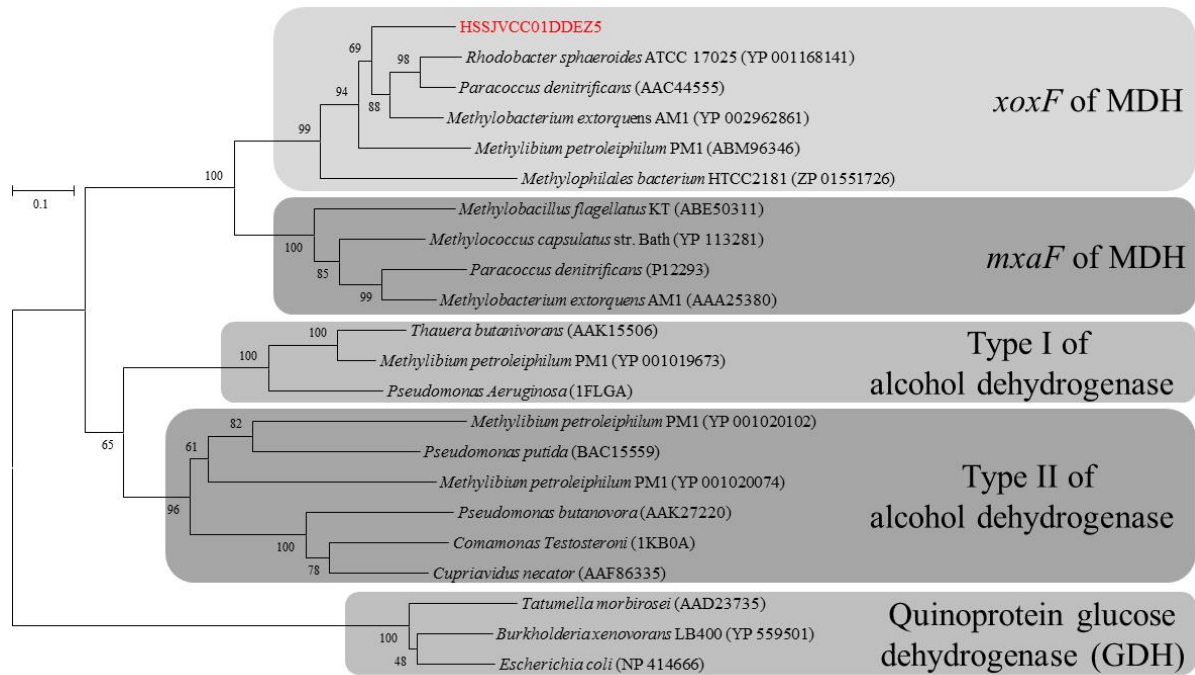

42

43

44 Figure S2. Phylogenetic distance tree analysis of methanol dehydrogenase (MDH)-related  
 45 sequence reads. TBLASTN search found 34 reads of MDH in the metagenome of the  
 46 bacterial community of sugar beet taproot. The MDH type (*xoxF* or *mxoF*) of these reads was  
 47 determined by individual phylogenetic distance tree analyses. “HSSJVCC01DDEZ5” (in red)  
 48 is a sequence read in sample NPK9. This read is located in the *xoxF* group of MDH. GenBank  
 49 accession numbers and RefSeq numbers for reference sequences (quinoprotein alcohol  
 50 dehydrogenase) are shown in parentheses. The scale bar represents 0.1 substitutions per site.  
 51 The numbers at the nodes show the numbers out of 1000 bootstrap tests.

52

53

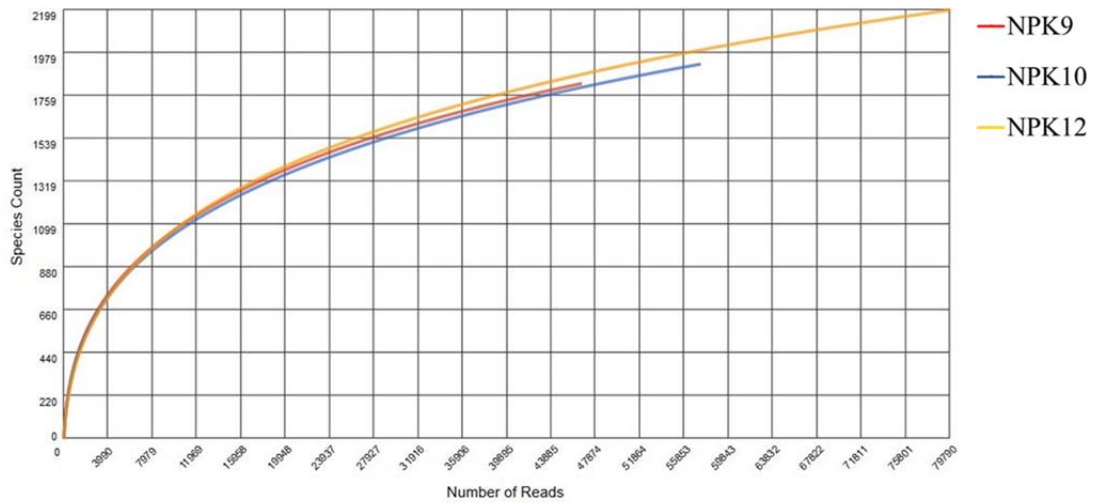

54

55 Figure S3. Rarefaction curve of the metagenomic DNA samples (samples NPK9, NPK10 and  
56 NPK12). The rarefaction curve was described by using the Metagenomics RAST server  
57 (MG-RAST; <http://metagenomics.anl.gov>). The data was compared to the non-redundant  
58 multi-source protein annotation database (M5NR) using a maximum e-value of  $1e^{-10}$ , a  
59 minimum identity of 60 %, and a minimum alignment length of 15 measured in amino acid  
60 for protein and bp for RNA databases. Alpha diversity of the metagenomic DNA samples  
61 (samples NPK9, NPK10 and NPK12) were 191, 186 and 211, respectively.

62

63

64

65

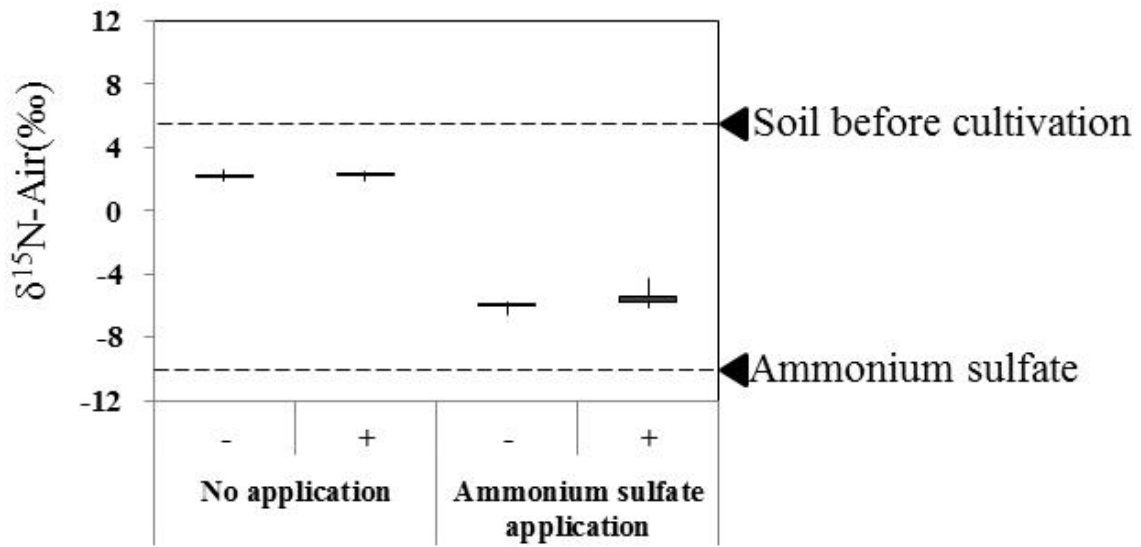

66

67

68 Figure S4.  $\delta^{15}\text{N-air}$  (‰) in the roots of sugar beet exposed to  $^{15}\text{N}_2$ . Plants were grown with or  
69 without ammonium sulfate application. Harvested roots were exposed (+) to  $^{15}\text{N}_2$  for 24 h.

70 Unexposed roots were used as a negative control (-). Dotted lines show the  $\delta^{15}\text{N-air}$  values of  
71 soil before cultivation (5.477 ‰) and of ammonium sulfate (-9.863 ‰).

72
